# Supplementary material
Source: MDPI journal article supplement (https://www.mdpi.com/2073-4441/13/9/1154)
Supplement: s1 [file s1]

## Supplementary Materials

Figure S1 shows the calibration curves of MB at pH 8.

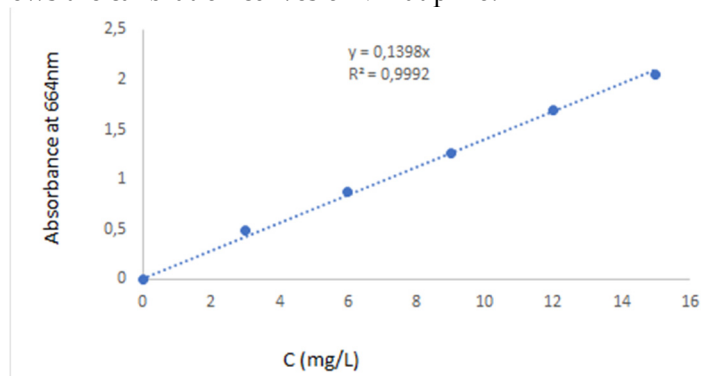

Figure 1. MB standard curve.

### 2.3.1. Carbonized Pretreatment

Fifty grams of dried algae (*U. lactuca*: UL-NA) were carbonization activated by heating at 600 °C in a high-performance electric Muffle Furnace (Shin Saeng Scientific Co., Ltd, SEF-301, KOREA) for 4 h with a flow of 30 mL min<sup>-1</sup> at a heating rate of 5 C min<sup>-1</sup>. The activated powder was then washed twice with double-ionized water in order to neutralize it (to keep the pH of the filtrate constant at a value of 7.0) and then dried in an oven (DEPATCH Oven Co) at 60 °C for 24 h. The active algal biomass obtained by the carbonization of dried algae was labeled UL-T.

### 2.3.2. Pretreatment with Chemical Reagent

Fifty grams of dried algae (*U. lactuca*: UL-NA) were successively activated using concentrated H<sub>2</sub>SO<sub>4</sub> (97%) or NaOH (97%). Stirring at room temperature using a rotary agitator at 200 rpm and for 24 h was then carried out on the various mixtures. The mixtures were then filtered, rinsed twice with double-ionized water to isolate the rest of the H<sub>2</sub>SO<sub>4</sub> and NaOH, then neutralized with 0.1 M NaOH and 0.1 M HCl, respectively, to keep the pH of the filtrate constant at 7.0. The biomasses thus obtained were dried in an oven (DESPATCH Oven Co, LAC1-67-7, USA) at 60 °C for 24 h. The active algal biomasses obtained after the activation by H<sub>2</sub>SO<sub>4</sub> and NaOH were, respectively, labeled UL-H and UL-OH for the dried seaweed. Non-activated biomass was used as positive control to compare the raw material of *U. lactuca* without any artificial modifications with modified carbon derived from *U. lactuca*. Furthermore, water insoluble substances remained after removing the hydrophilic substances were used as negative control to compare the strong activation methods carried out by strong alkali solution (97% NaOH) and strong acidic solution (97% H<sub>2</sub>SO<sub>4</sub>) with moderated activation method performed by water.

The activated materials generated by using 10 g of fresh thalli after activation (UL- WIS, UL-H, UL-OH, and UL-T) were measured and we got 36%, 52%, 42%, and 41.6% respectively along with 83% biomass of UL-NA, which indicated that activated biomass was not dissolved completely but mineralized and generated activated carbon. It must be mentioned that for logical comparison we used the same concentration of H<sub>2</sub>SO<sub>4</sub> and NaOH to obtain UL-H and UL-OH respectively. Many studies used high concentration of H<sub>2</sub>SO<sub>4</sub> as well as NaOH in addition to pyrolysis and heating at the same time

to generate activated carbon (Cazetta et al., 2011; Sultan et al., 2020; Tseng, 2006; Wahlström et al., 2020), whereas our study used only high concentration of NaOH or H<sub>2</sub>SO<sub>4</sub> without applying heat or pyrolysis on the same treatments.

Figure S2 shows the TEM micrograph of raw dry *U. lactuca* (UL-NA), UL-WIS, and differently treated *U. lactuca* (UL-OH, UL-H, UL-T) before and after 75 min of contact with methylene blue at 1500 magnification.

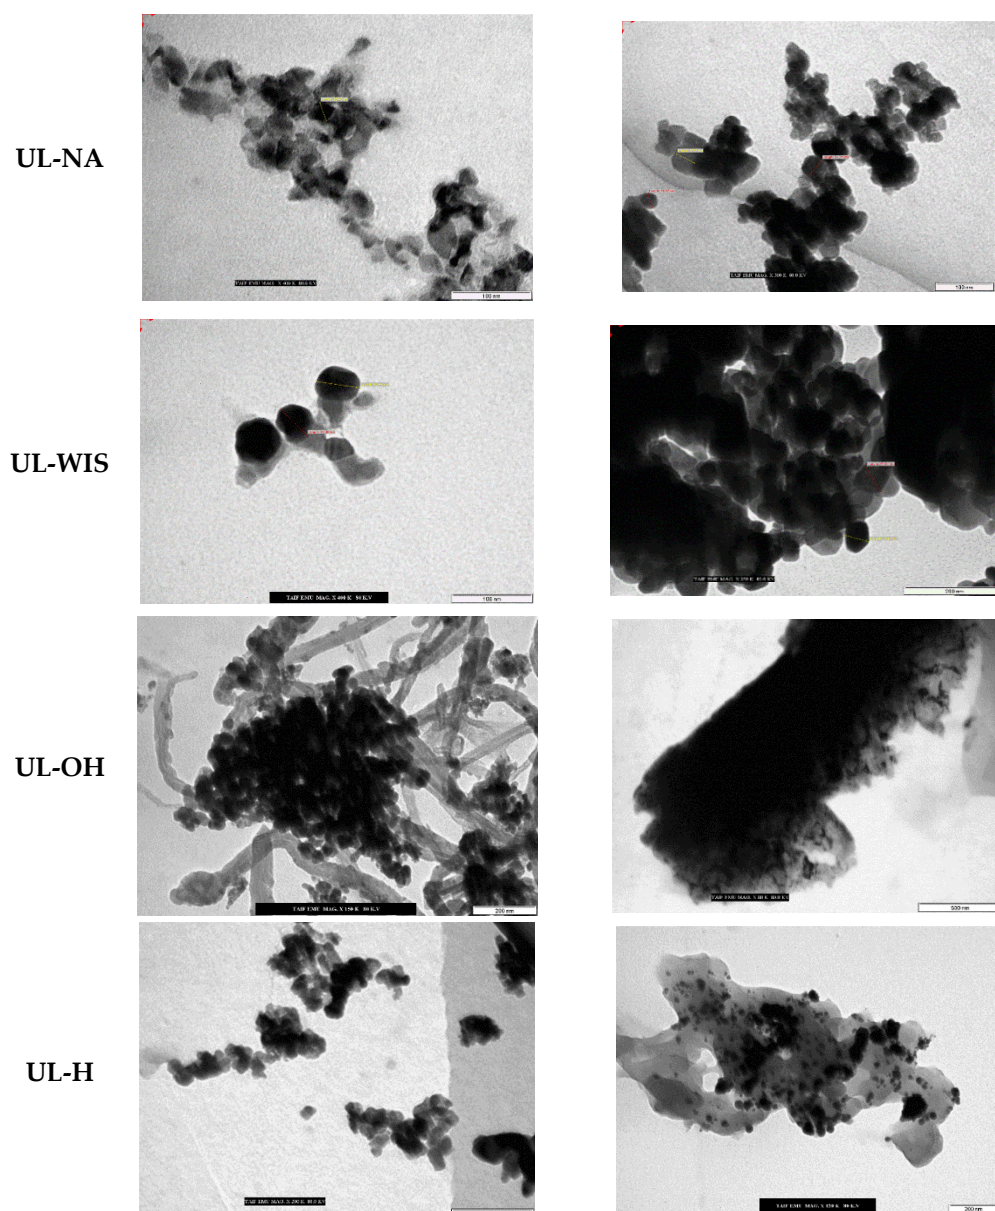

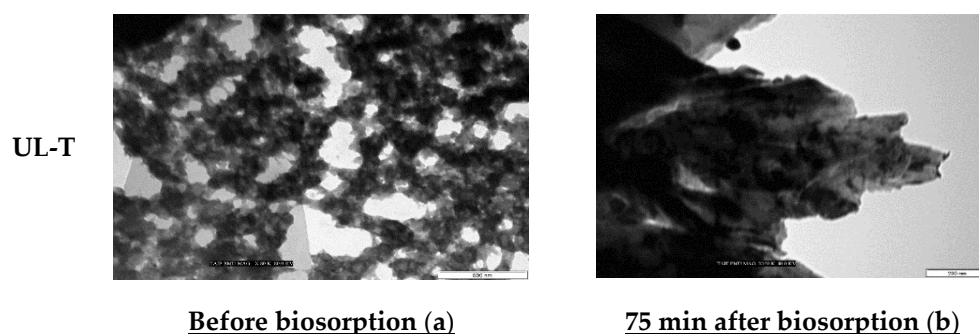

**Figure 2.** TEM micrograph of raw dry *U. lactuca* (UL-NA), UL-WIS, and differently treated *U. lactuca* (UL-OH, UL-H, UL-T) before (a) and after 75 min of contact with methylene blue (b) at 1500 magnification.

**Table S1.** Loss of mass of different biomass compared to the non-activated algae (UL-NA)

| Yield% | Loss of mass% | Biomass |
|--------|---------------|---------|
| 52.0   | 48.0          | UL-WIS  |
| 36.0   | 64.0          | UL-OH   |
| 42.0   | 58.0          | UL-H    |
| 41.6   | 58,4          | UL-T    |
